# Supplementary material
Source: PubMed Central journal article supplement (PMC10330847)
Supplement: NIHMS1903159-supplement-1.pdf [file NIHMS1903159-supplement-1.pdf]

**Supplementary Table 1.** Cryo-EM and Refinement Statistics of *P. calidifontis* and *A. veneficus* ECNs

| Parameter                                           | <i>P. calidifontis</i> | <i>A. veneficus</i> |
|-----------------------------------------------------|------------------------|---------------------|
| <b>Data collection and processing</b>               |                        |                     |
| Voltage (kV)                                        | 300                    | 300                 |
| Electron exposure (e <sup>-</sup> Å <sup>-2</sup> ) | 46                     | 45                  |
| Pixel size (Å)                                      | 1.08                   | 1.08                |
| Particle images (n)                                 | 101,864                | 92,602              |
| Shift (pixel)                                       | 36                     | 36                  |
| <b>Helical symmetry</b>                             |                        |                     |
| Point group                                         | C1                     | C1                  |
| Helical rise (Å)                                    | 32.38                  | 32.74               |
| Helical twist (°)                                   | 54.72                  | 33.52               |
| <b>Map resolution (Å)</b>                           |                        |                     |
| Map:map FSC (0.143)                                 | 3.8                    | 3.9                 |
| Model:map FSC (0.38)                                | 3.8                    | 4.1                 |
| d <sub>99</sub>                                     | 4.1                    | 4.4                 |
| <b>Refinement and Model validation</b>              |                        |                     |
| Ramachandran Favored (%)                            | 87.0                   | 90.3                |
| Ramachandran Outliers (%)                           | 0.0                    | 0.4                 |
| RSCC                                                | 0.84                   | 0.76                |
| Clashscore                                          | 15.2                   | 36.3                |
| Bonds RMSD, length (Å)                              | 0.007                  | 0.005               |
| Bonds RMSD, angles (°)                              | 0.910                  | 0.868               |
| <b>Deposition ID</b>                                |                        |                     |
| PDB (model)                                         | 8E5F                   | 8E5G                |
| EMDB (map)                                          | EMD-27911              | EMD-27912           |
