# Supplementary material
Source: PubMed Central journal article supplement (PMC10330847)
Supplement: NIHMS1903159-supplement-3.pdf [file NIHMS1903159-supplement-3.pdf]

526 **Supplemental Figure titles and legends**

527  
528 **Supplementary Table 1.** Cryo-EM and Refinement Statistics of *P. calidifontis* and *A. veneficus* ECNs, related to  
529 Figure 1 and Figure 2.

530  
531 **Supplementary Data 1.** The tree analysis of AvECN homologs, related to Figure 5.

532  
533 **Supplementary Figure 1.** Fourier Shell Correlation (FSC) calculations and average power spectrum, related to  
534 Figure 1 and Figure 2.

535 (A) The map:map FSC calculation of *P. calidifontis* ECN (0.143 cutoff)

536 (B) The average power spectrum from PcECN raw particles aligned to the same axis.

537 (C) The map:map FSC calculation of *A. veneficus* ECN (0.143 cutoff)

538 (D) The average power spectrum from AvECN raw particles aligned to the same axis.

539  
540 **Supplementary Figure 2.** ECN protein identification from cryo-EM maps, related to Figure 1 and Figure 2.

541 (A) AlphaFold2 predictions of multi-heme cytochromes containing three or more CxxCH motifs in *P. calidifontis*  
542 were docked into the cryo-EM map corresponding to a single protein subunit. The color codes:  $\alpha$ -helices are  
543 yellow;  $\beta$ -sheets are blue; loops are green.

544 (B) AlphaFold2 predictions of multi-heme cytochromes containing three or more CxxCH motifs in *A. veneficus*  
545 were docked into the cryo-EM map corresponding to a single protein subunit. The color code is the same as in  
546 (A). The area of the AlphaFold2 predictions that cannot be possibly adjusted and fit into the map are highlighted  
547 by red arrows.

548  
549  
550 **Supplementary Figure 3.** Protein sequences and cryo-EM densities of the heme c area in PcECN and AcECN,  
551 related to Figure 3.

552 (A) Protein sequence of PcECN. CxxCH or CxCH motifs are highlighted in the cyan shade. The other histidines  
553 outside those motifs coordinating heme c are highlighted in green. The predicted signal peptide is in the black  
554 dashed line box. The predicted transmembrane region, not seen in the cryo-EM map, is highlighted in red  
555 shade.

556 (B) Zoomed-in views of the heme c area in PcECN. From left to right, heme 1 to heme 4. The protein-heme  
557 color scheme remains the same compared to Fig. 1. Two cysteines and histidines bound to heme c are also  
558 labeled.

559 (C) Protein sequence of AvECN. CxxCH motifs are highlighted in the cyan shade. The other histidines outside  
560 CxxCH motifs coordinating heme c are highlighted in green. The predicted signal peptide is in the black dashed  
561 line box.

562 (D) Zoomed-in views of the heme c area in AvECN. From left to right, heme 1 to heme 4. The protein-heme  
563 color scheme remains the same compared to Fig. 2. Two cysteines and histidines bound to heme c are also  
564 labeled.

565  
566 **Supplementary Figure 4.** Potential factors contributing to the thermal stability of ECNs, related to Figure 4.

567 (A) Disulfide bonds in *P. calidifontis* ECN. The full atomic model of one *P. calidifontis* ECN subunit is shown on  
568 the left with the cryo-EM density corresponding to a single cytochrome subunit. Two disulfide bonds were  
569 observed and highlighted in yellow circles. Those two sites are magnified on the right.

570 (B-C) Surface modifications of PcECN (B) and AvECN (C) filaments. The density accounted for by atomic models  
571 is colored in gray, and the extra density is colored in magenta. The protein backbones of ECN filaments are  
572 shown in ribbons with protein cryo-EM densities.

573  
574 **Supplementary Figure 5.** *A. veneficus* ECN may have evolutionary link to cytochrome c552, related to Figure 5.

575 (A-B) Results of the HHsearch analysis queried with the sequences of AvECN (A) and AvECN-like protein from a  
576 Planctomycetota bacterium (B). The GenBank accession number of (B) is MCH2104266. H(h),  $\alpha$ -helix; E(e),  $\beta$ -  
577 strand; C(c), coil.

578 (C) Heme-based sequence alignment of *A. veneficus* ECN and *T. tepidum* cytochrome c552. Secondary structures  
579 are labeled:  $\alpha$ -helices in rounded rectangles,  $\beta$ -sheets in arrows, and loops in dashed lines.

580 (D) The individual structures of *A. veneficus* ECN, *T. tepidum* cytochrome c552, and their alignment. Four hemes  
581 used for the alignments in both structures are highlighted in purple. The unused heme molecular in *T. tepidum*  
582 cytochrome c552 is colored orange. Proteins are colored grey.

583 (E) The individual structures of *A. veneficus* ECN, *T. tepidum* cytochrome c552, and their alignment. Hemes are  
584 hidden in this panel. The labeled secondary structures in (C) are colored accordingly. Other unaligned secondary  
585 structures are kept grey. A magnified view of the aligned helices is shown on the right

**A**

GSFSC Resolution: 3.79Å

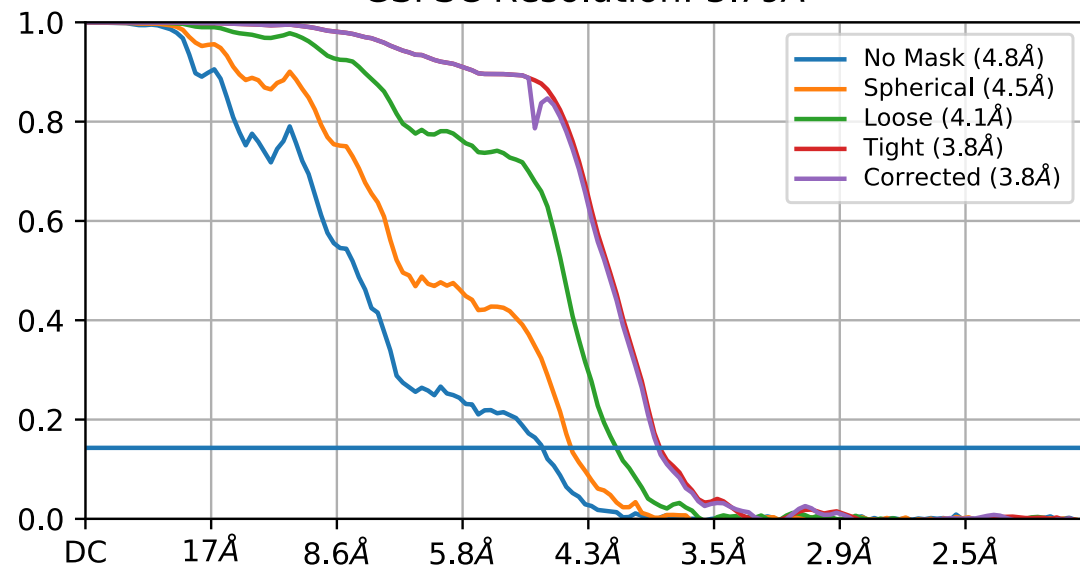*P. calidifontis* ECN (map:map)**C**

GSFSC Resolution: 3.94Å

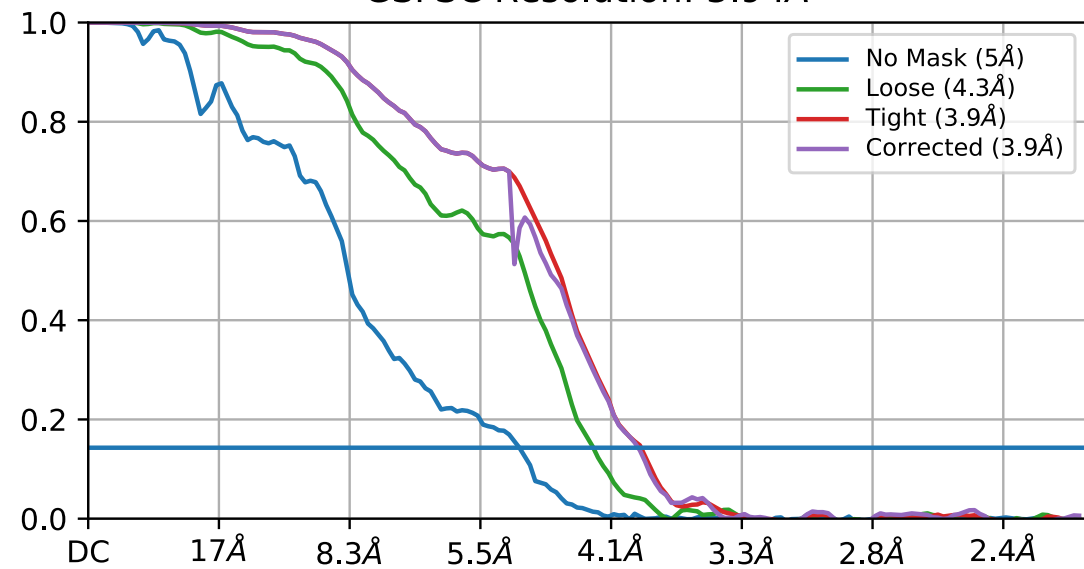*A. veneficus* ECN (map:map)**B**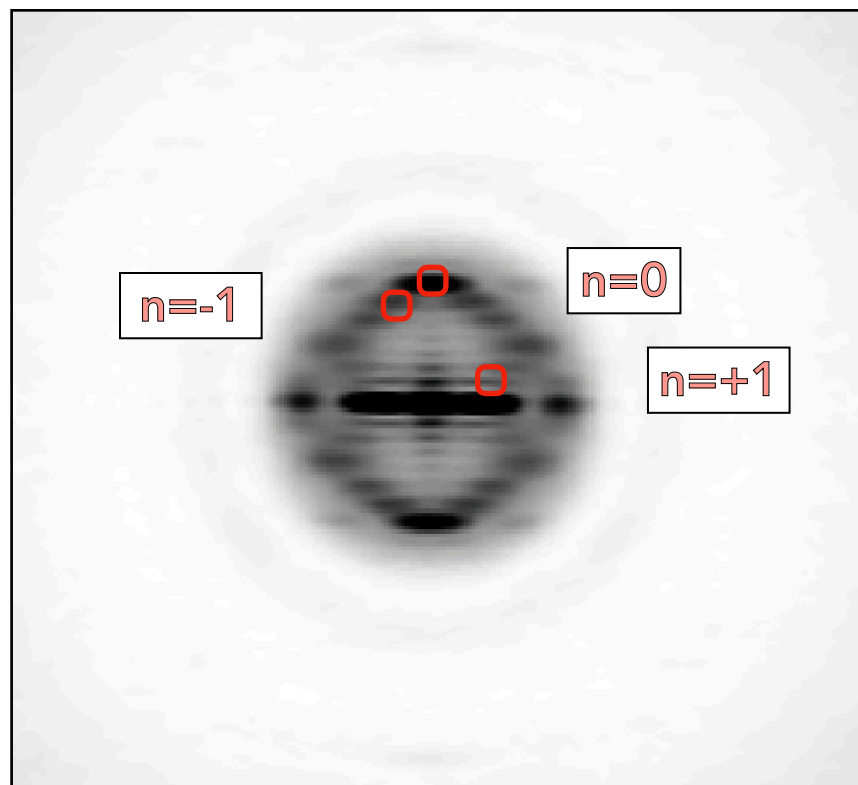**D**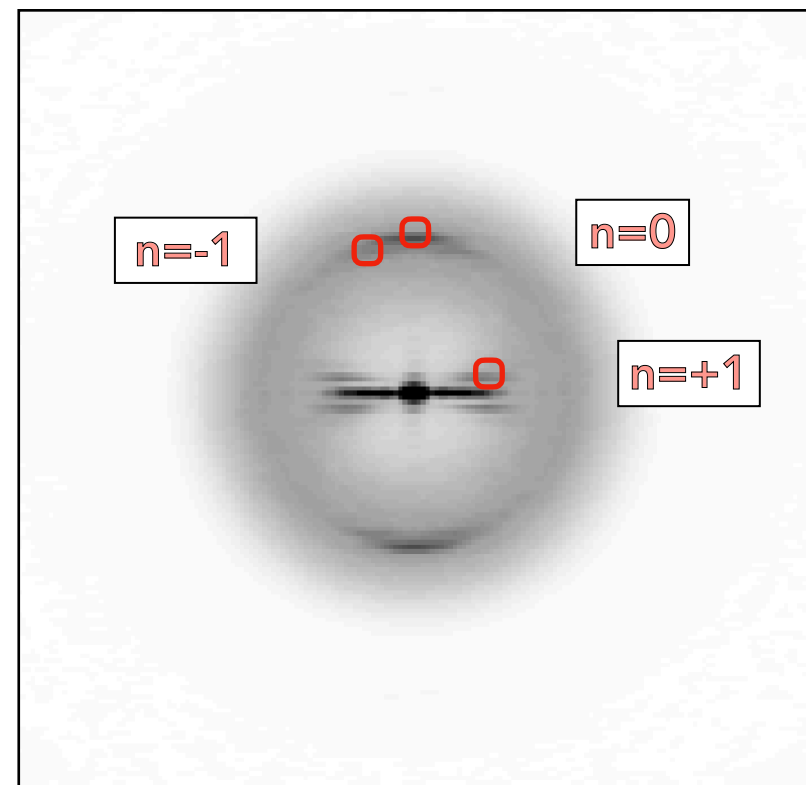

**A**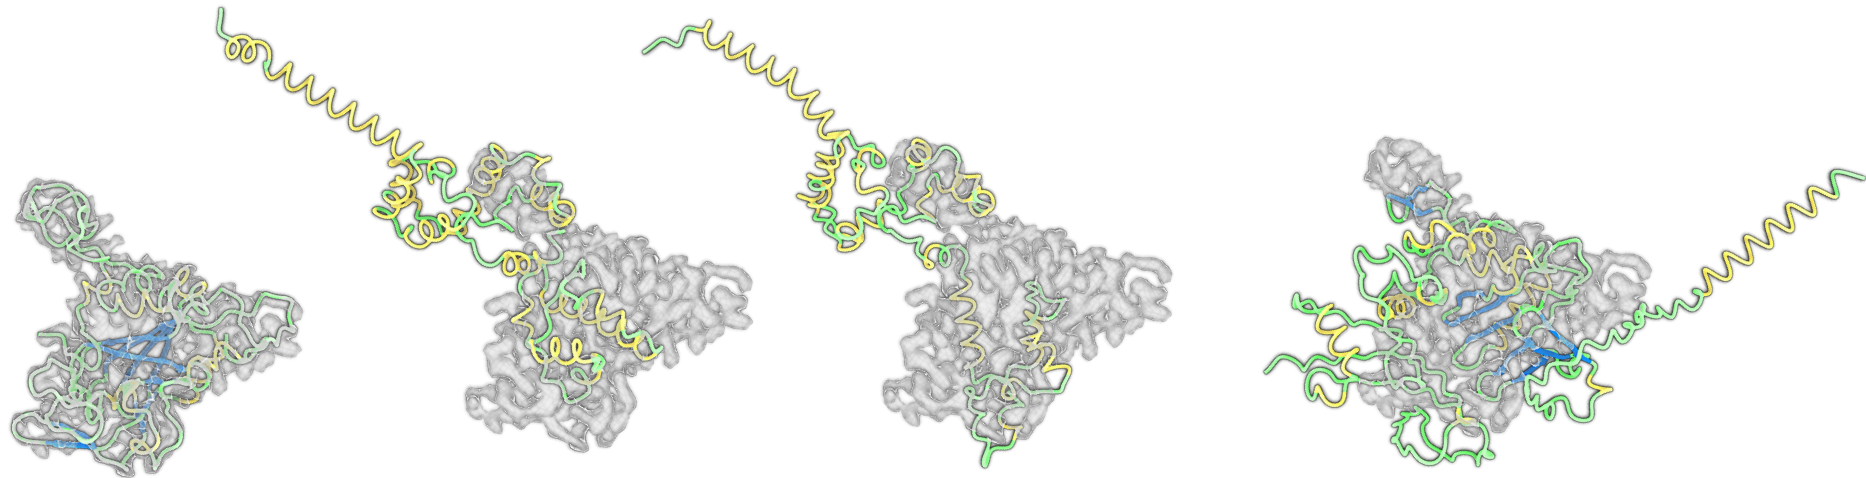

A3MW92  
*P. calidifontis* ECN

A3MW94  
AlphaFold prediction

A3MW99  
AlphaFold prediction

A3MW89  
AlphaFold prediction

**B**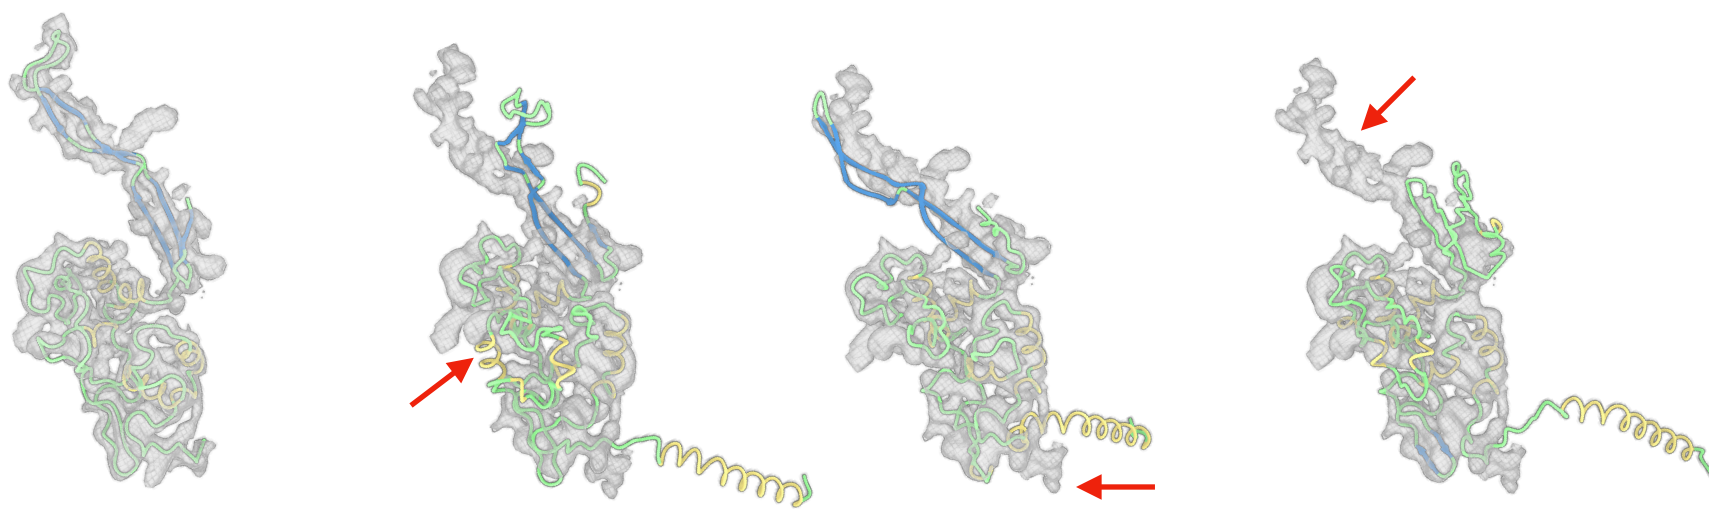

F2KMU8  
*A. veneficus* ECN

F2KMU7  
AlphaFold prediction

F2KPF5  
AlphaFold prediction

F2KRJ1  
AlphaFold prediction

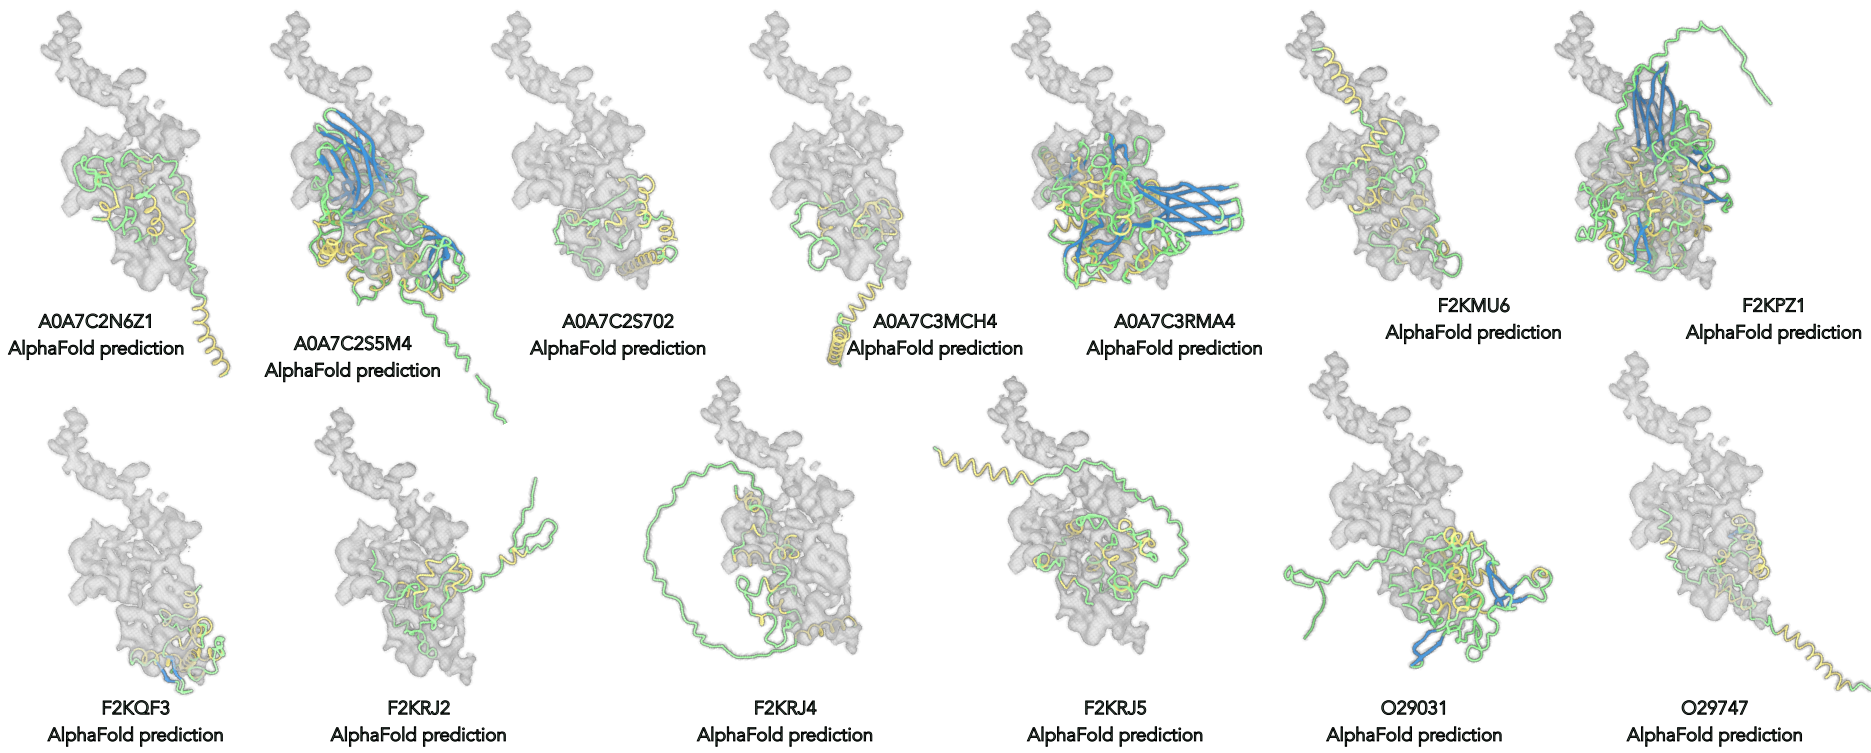

A0A7C2N6Z1  
AlphaFold prediction

A0A7C2S5M4  
AlphaFold prediction

A0A7C2S702  
AlphaFold prediction

A0A7C3MCH4  
AlphaFold prediction

A0A7C3RMA4  
AlphaFold prediction

F2KMU6  
AlphaFold prediction

F2KPZ1  
AlphaFold prediction

F2KQF3  
AlphaFold prediction

F2KRJ2  
AlphaFold prediction

F2KRJ4  
AlphaFold prediction

F2KRJ5  
AlphaFold prediction

O29031  
AlphaFold prediction

O29747  
AlphaFold prediction

**A** *PcECN* 1: MKKFPALITTL LLLAVFVAA<sup>T</sup>YGPYSYN<sup>H</sup>PTNC<sup>I</sup>SCHSNSTGTANSQALSGLTSGPAAGACDPSQQECVWS<sup>H</sup>HQVLKGTD 80  
*PcECN* 81 VWKK<sup>C</sup>INCHVAIWNSINSGPGNV<sup>H</sup>SGLLNSYGCACHAVA<sup>H</sup>VGYGNPTDGYTACIYFYVPRLLSTATPGYFGAKPTLDFRNV 160  
*PcECN* 161 YICFKGTPEGTYTFSGNAPTS LMQLLESKGEVTVKALLVGYDKYANGTVKAKSSAADFLETDFFSALEQAGIFRYEWGTA 240  
*PcECN* 241 SGAVLKNPSVRTHPLTEEAPNGETIVMGVFDIHTGDFILVAPYAPYSRAPYYLPVAVNPGVAA<sup>C</sup>FNCHFVYQGQLGTAKV 320  
*PcECN* 321 MEVGGVWKIGIPADVLNSLTDPHKIVMPAAQAAGGGVAPN<sup>L</sup>SLVALLATATLLGGAF<sup>L</sup>LRRRAQ 385

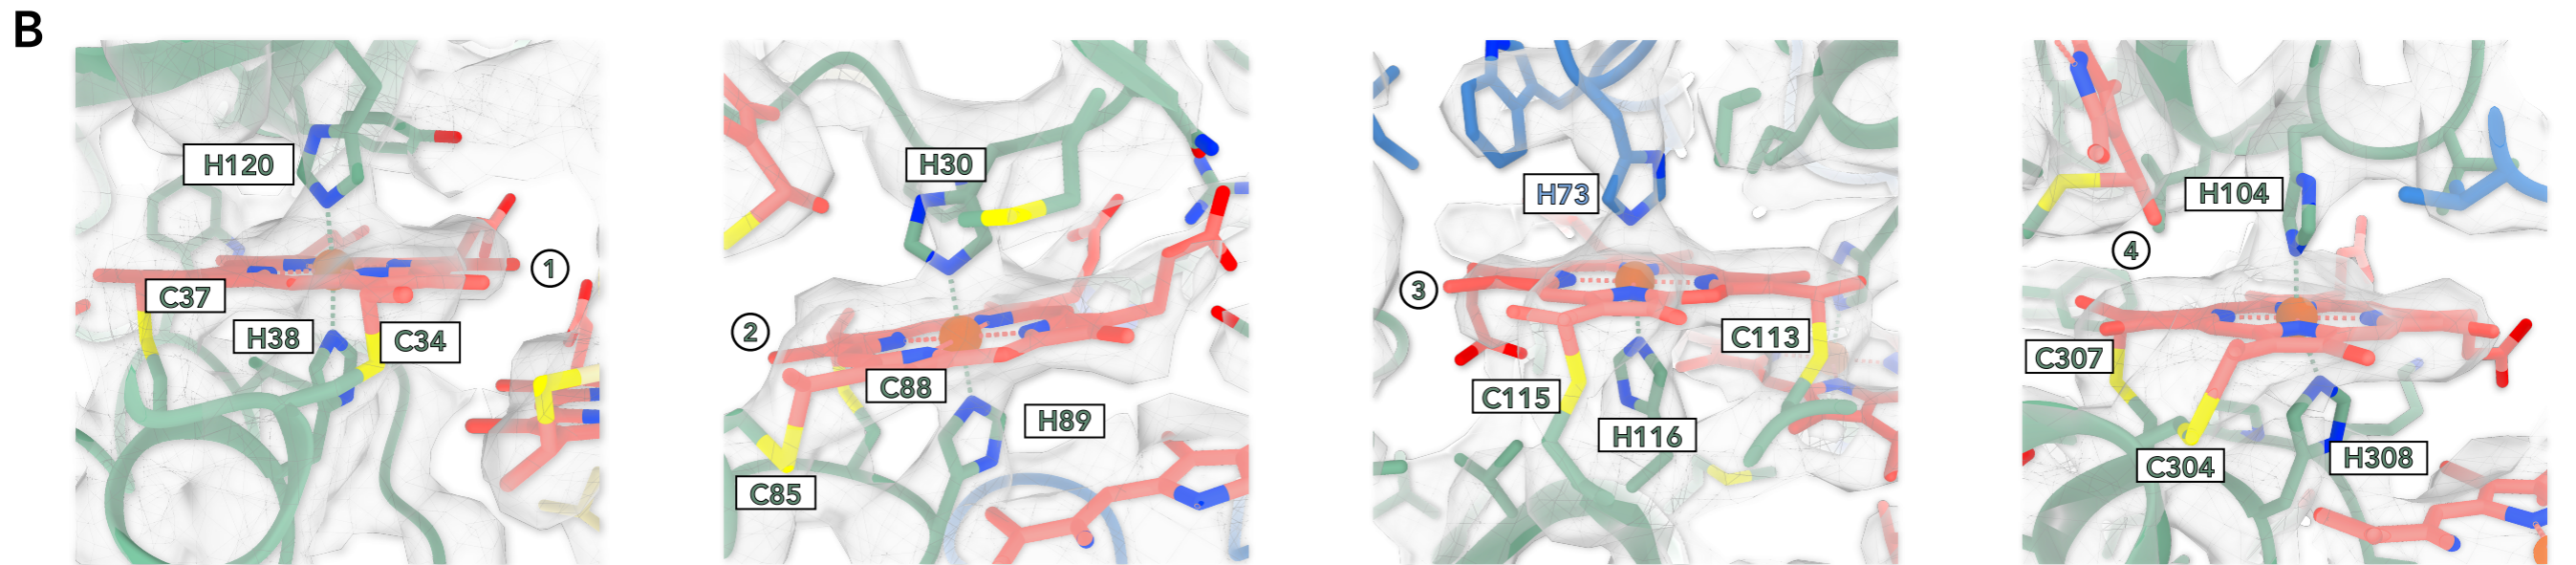

**C** *AcECN* 1: MNGGKLALLMVTLAAMGTLVLPSTTS<sup>L</sup>FLGQ<sup>H</sup>MWYNI SGTGNNLP<sup>C</sup>EKCHADVFAEFKNNPGA<sup>H</sup>KTIGGGTDTVEH IRAA 80  
*AcECN* 81 <sup>C</sup>GECHRTSVVGTFASGDGTSATPGQEA<sup>H</sup>AAATIA<sup>C</sup>MACHEFGPNGNAPYSGAPVAGGF DNVT TDTASSPYN DNGD TTYG 160  
*AcECN* 161 TKEA<sup>H</sup>QTFIERAVEDKTLIDSNEA<sup>C</sup>IACHTYVPVKINWTHKVSLEFNCTYEYNTGTSGVTTHYNVTNWTVNGTRYTTVFG 240  
*AcECN* 241 NTTGNGSVNDASNWP GWYPYSW 262

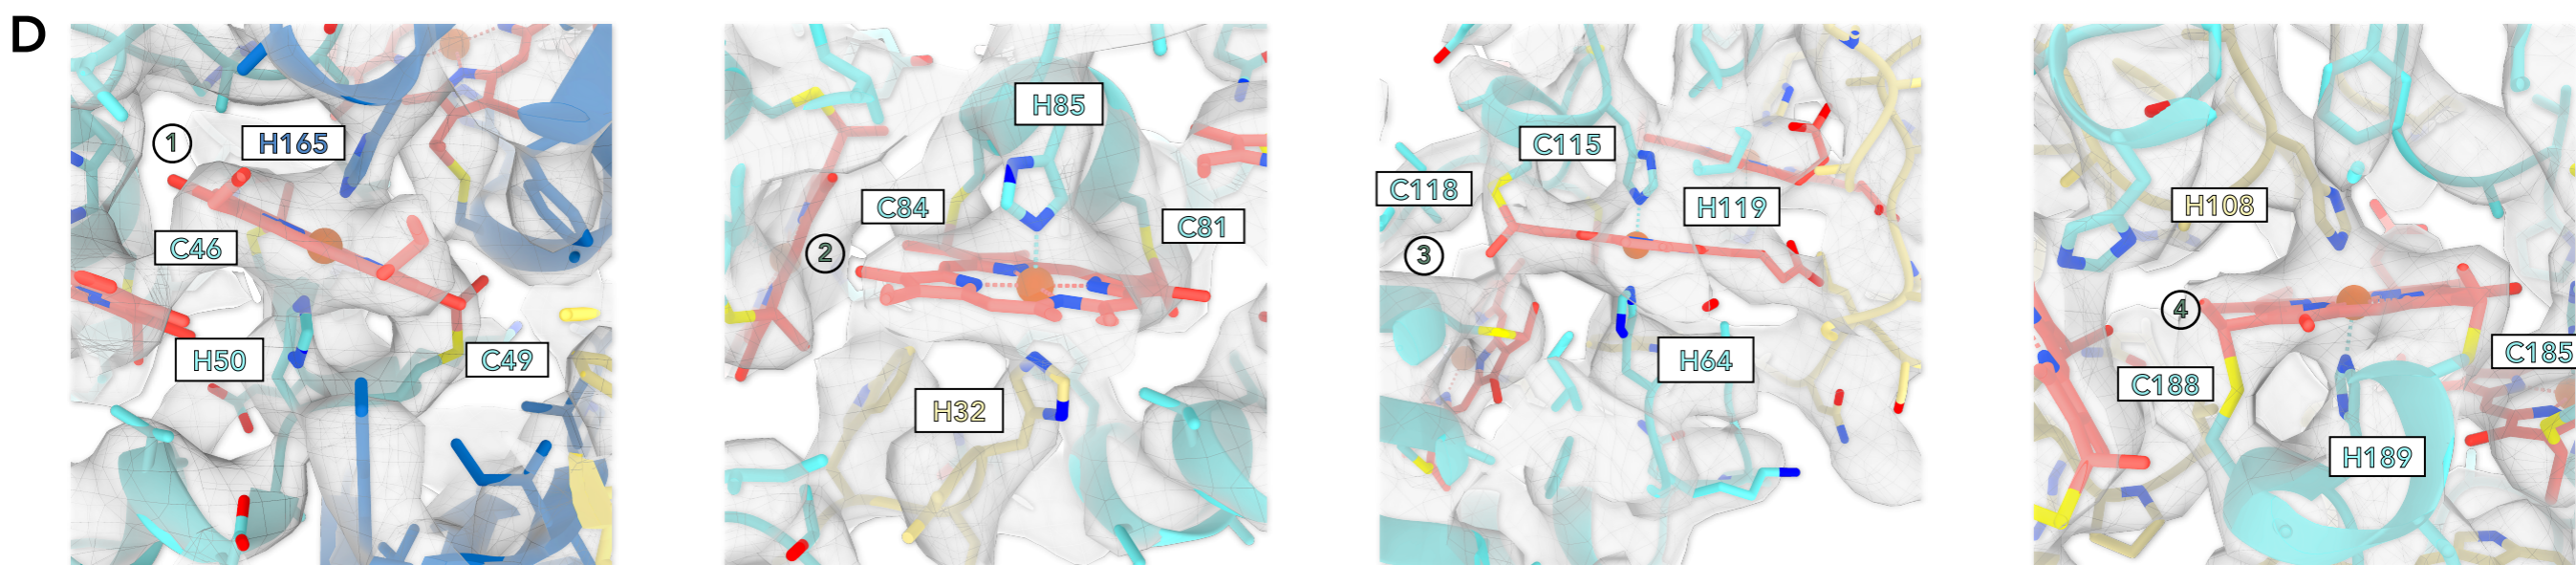

**A**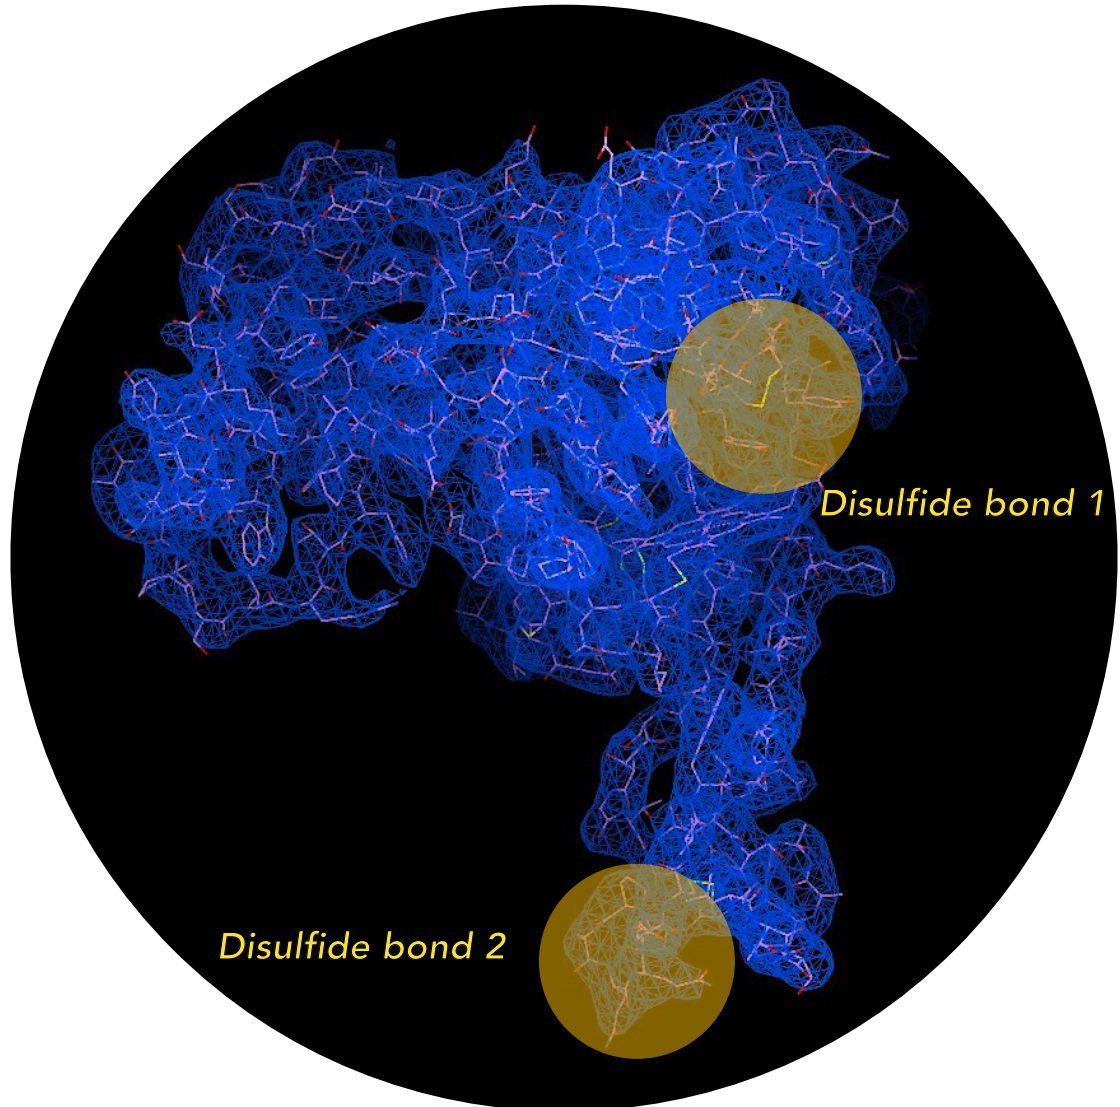*P. calidifontis* ECN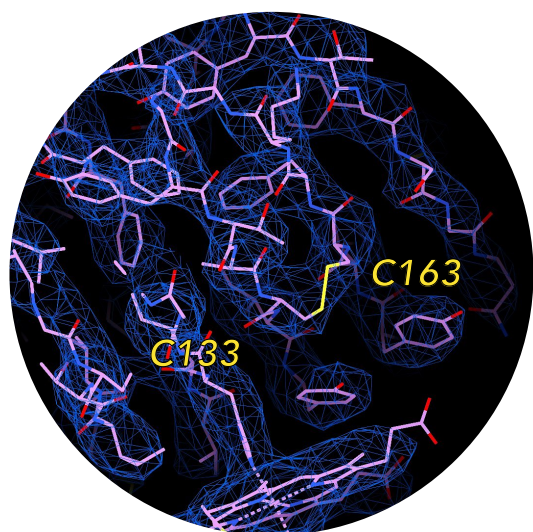*Disulfide bond 1*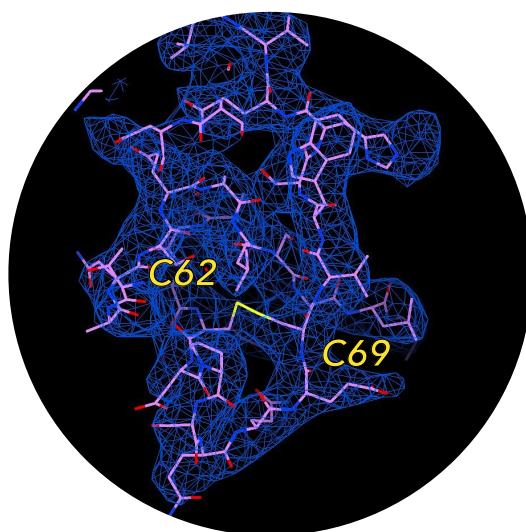*Disulfide bond 2***B**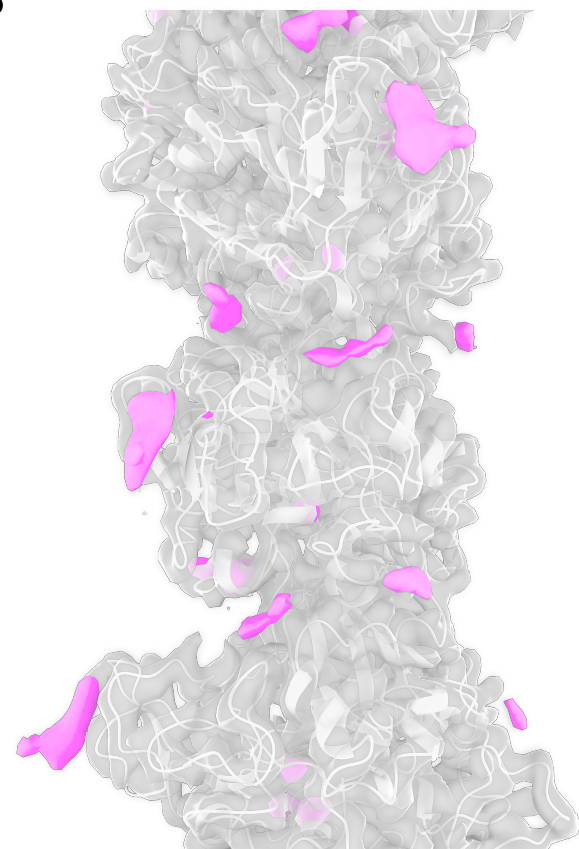*P. calidifontis* ECN**C**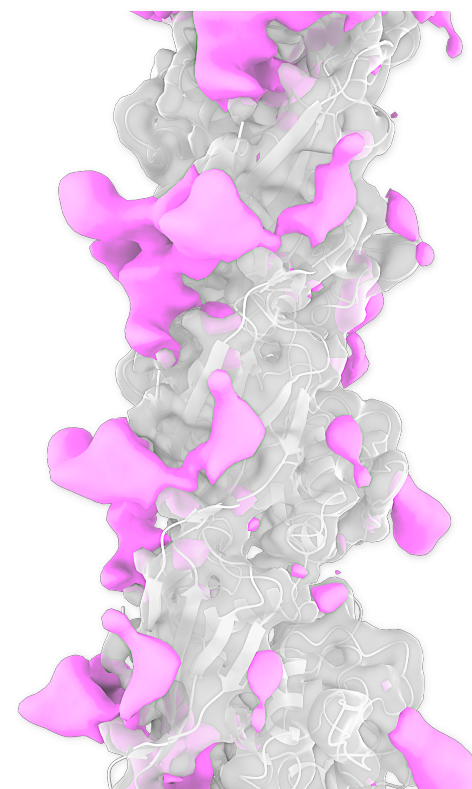*A. veneficus* ECN
